# Supplementary material for: Assembly of co-bimb-polyoxotungstate hybrids: from 1D chain to 3D framework influenced by the charge of Keggin anions
Source: Royal Society of Chemistry journal article supplement (doi:10.1039/c3ra45456h), 2013-11-21
Supplement: c3ra45456h.pdf [file c3ra45456h.pdf]

Electronic Supplementary Information for:

**Assembly of Co-bimb-polyoxotungstate Hybrids:  
From 1D Chain to 3D Framework Influenced by the  
Charge of Keggin Anions†**

**Tingting Yu, Kun Wang, Huiyuan Ma\*, Haijun Pang\* and Shaobin Li**

**Table of contents:**

1. **Fig. S1** The  $\mu_2$  coordination mode of the bimb ligand
2. **Fig. S2** The interdigitated architecture in **2**
3. **Fig. S3** IR spectra of **1** and **2**
4. **Fig. S4** The simulative (red) and experimental (black) powder X-ray diffraction patterns for **1** (left) and **2** (right)
5. **Fig. S5** The TG curves for compound **1** (left) and compound **2** (right).
6. **Fig. S6** The CVs of **1**-CPE (left) in the 0.5 M Na<sub>2</sub>SO<sub>4</sub>/H<sub>2</sub>SO<sub>4</sub> aqueous solution and **2**-CPE (right) in 1M LiCl-H<sub>2</sub>SO<sub>4</sub> aqueous solution at the scan rate of 20 mV·s<sup>-1</sup>
7. **Fig. S7** 40 consecutive CV cycles of the **1**-CPE (left) and **2**-CPE (right) at the scan rate of 50 mV·s<sup>-1</sup>

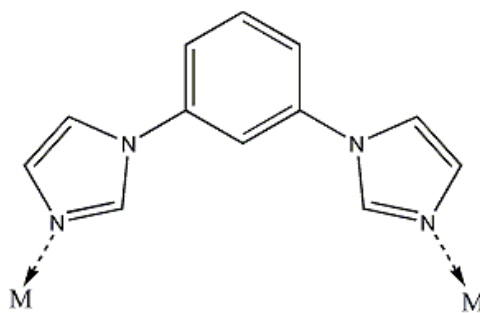

**Fig. S1** the  $\mu_2$  coordination mode of the bimb ligand

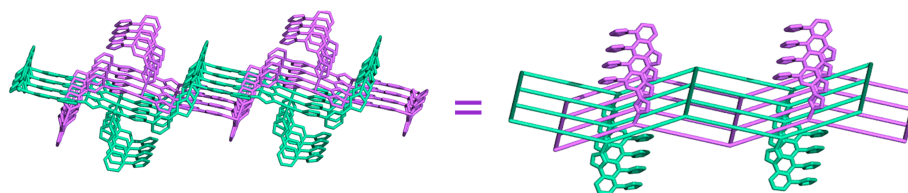

**Fig. S2.** The interdigitated architecture in **2**.

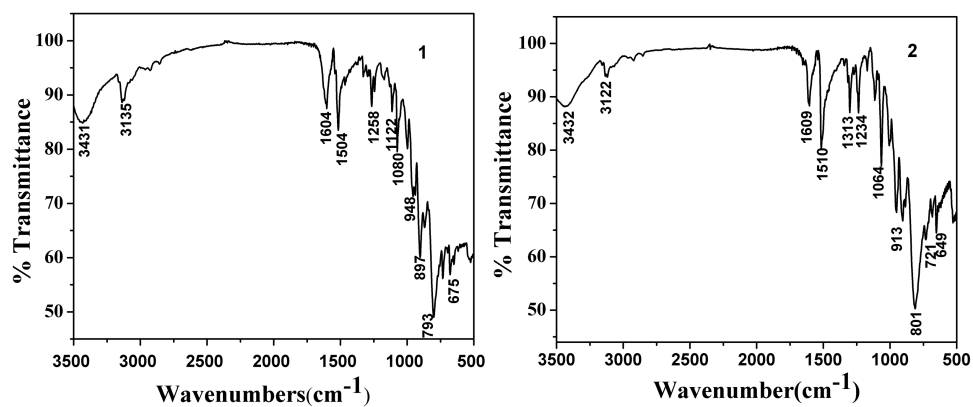

**Fig. S3** IR spectra of **1** and **2**.

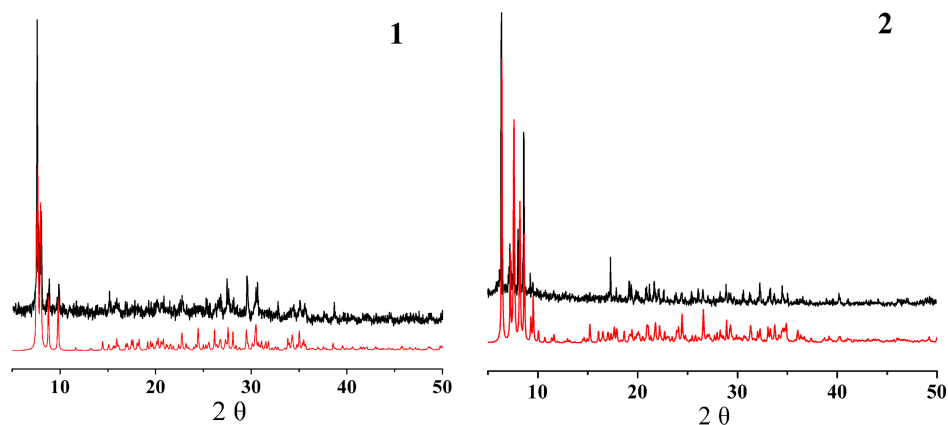

**Fig. S4.** The simulative (red) and experimental (black) powder X-ray diffraction patterns for **1** (left) and **2** (right)

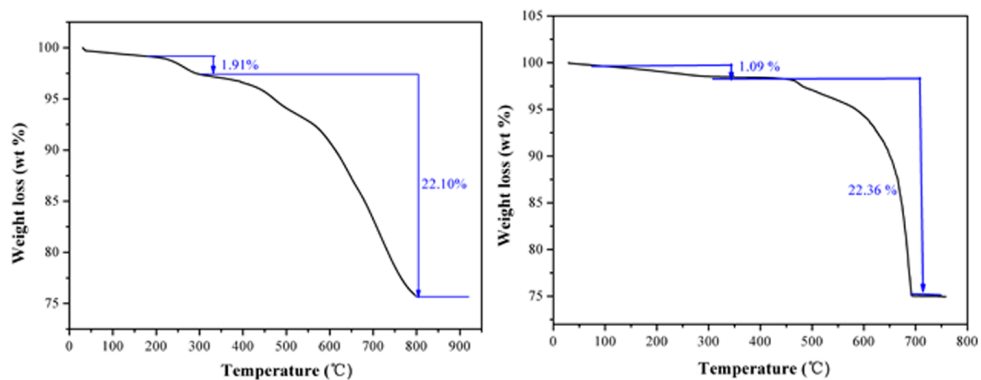

**Fig. S5** The TG curves for compound **1** (left) and compound **2** (right).

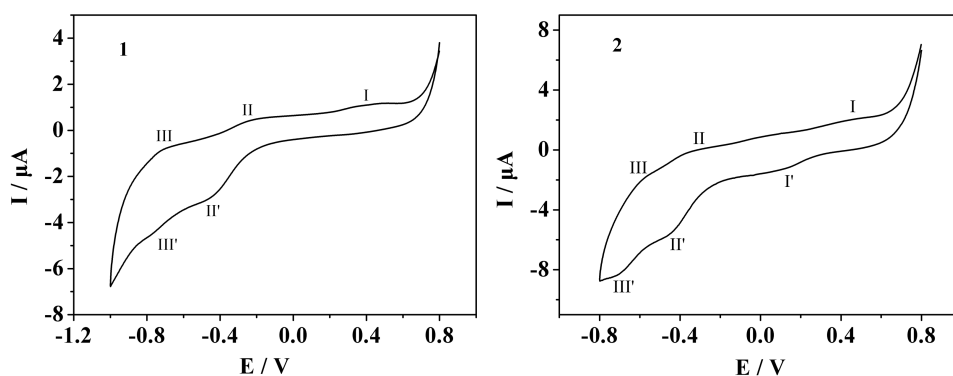

**Fig. S6.** The CVs of **1**-CPE (left) in the 0.5 M Na<sub>2</sub>SO<sub>4</sub>/H<sub>2</sub>SO<sub>4</sub> aqueous solution and **2**-CPE (right) in 1M LiCl-Na<sub>2</sub>SO<sub>4</sub> aqueous solution at the scan rate of 20 mV·s<sup>-1</sup>.

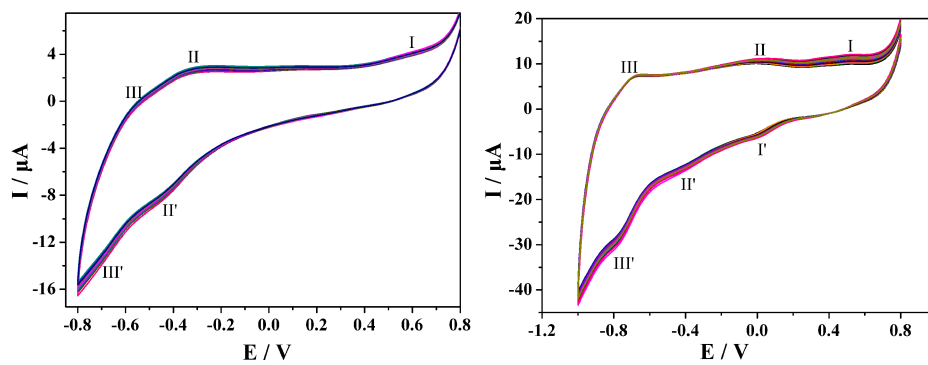

**Fig. S7** 40 consecutive CV cycles of the **1-CPE** (left) and **2-CPE** (right) at the scan rate of  $50 \text{ mV} \cdot \text{s}^{-1}$
